# Supplementary material for: Pan-Genomic Analysis Provides Insights into the Genomic Variation and Evolution of Salmonella Paratyphi A
Source: PLoS One. 2012 Sep 19;7(9):e45346. doi: 10.1371/journal.pone.0045346 (PMC3446902; doi:10.1371/journal.pone.0045346)
Supplement: Table S5 — Pseudogene clusters in the whole seven S. Paratyphi A strains. (XLS) [file pone.0045346.s005.xls]

## Sheet: Pseudogene_Clusters_Details
Cluster ID	Conservation_level	ATCC_9150	AKU_1260	GXS2268	GZ9A00052	JX05-19	YN09620	ZJ98-53	Description
1	7	3176886	6809361	GXSPA_0028	GZSPA_0028	JXSPA_0028	YNSPA_0028	ZJSPA_0029	glutathione-regulated potassium-efflux system ancillary protein KefF
2	7	3176151	6809470	GXSPA_0140	GZSPA_0141	JXSPA_0140	YNSPA_0140	ZJSPA_0143	ferrichrome outer membrane transporter
3	7	3176190	6809473	GXSPA_0144	GZSPA_0145	JXSPA_0144	YNSPA_0144	ZJSPA_0147	fimbrial outer membrane usher
4	7	3177891	6809475	GXSPA_0147	GZSPA_0148	JXSPA_0147	YNSPA_0147	ZJSPA_0150	putative minor fimbrial subunit
5	7	3176140	6809559	GXSPA_0232	GZSPA_0231	JXSPA_0231	YNSPA_0231	ZJSPA_0234	HAD superfamily (subfamily IF) hydrolase, YfhB
6	7	3178956	6809571	GXSPA_0244	GZSPA_0243	JXSPA_0243	YNSPA_0243	ZJSPA_0246	DNA-binding transcriptional activator CadC
7	7	3175013	6809597	GXSPA_0272	GZSPA_0271	JXSPA_0271	YNSPA_0271	ZJSPA_0274	anaerobic dimethylsulfoxide reductase
8	7	3178868	6809610	GXSPA_0285	GZSPA_0284	JXSPA_0284	YNSPA_0284	ZJSPA_0288	intimin-like protein
9	7	3176910	6809612	GXSPA_0288	GZSPA_0287	JXSPA_0287	YNSPA_0287	ZJSPA_0291	outer membrane protein
10	7	3176808	6813545	GXSPA_0289	GZSPA_0288	JXSPA_0288	YNSPA_0288	ZJSPA_0292	ShdA
11	7	3178964	6809616	GXSPA_0294	GZSPA_0293	JXSPA_0293	YNSPA_0293	ZJSPA_0297	hypothetical protein
12	7	3176729	6809631	GXSPA_0309	GZSPA_0308	JXSPA_0308	YNSPA_0308	ZJSPA_0312	permease
13	7	3174860	6809646	GXSPA_0324	GZSPA_0324	JXSPA_0323	YNSPA_0324	ZJSPA_0327	nitrate/nitrite sensor protein NarQ
14	7	3175860	6809701	GXSPA_0384	GZSPA_0383	JXSPA_0382	YNSPA_0383	ZJSPA_0385	nucleoside transport
15	7	3174851	6809712	GXSPA_0397	GZSPA_0396	JXSPA_0395	YNSPA_0396	ZJSPA_0398	phosphoglycerate transport system sensor protein PgtB
16	7	3176164	6809715	GXSPA_0400	GZSPA_0399	JXSPA_0398	YNSPA_0399	ZJSPA_0401	transposase for the IS285 insertion element
17	7	56412814	6809824	GXSPA_0510	GZSPA_0508	JXSPA_0508	YNSPA_0508	ZJSPA_0511	competence damage-inducible protein A
18	7	3176631	6809899	GXSPA_0579	GZSPA_0577	JXSPA_0577	YNSPA_0584	ZJSPA_0588	L-serine ammonia-lyase
19	7	3177772	6809905	GXSPA_0586	GZSPA_0584	JXSPA_0584	YNSPA_0591	ZJSPA_0595	galactose/methyl galaxtoside transporter ATP-binding protein
20	7	56412965	6809973	GXSPA_0656	GZSPA_0653	JXSPA_0653	YNSPA_0660	ZJSPA_0664	hypothetical protein
21	7	56412973	6809981	GXSPA_0664	GZSPA_0661	JXSPA_0661	YNSPA_0668	ZJSPA_0673	multidrug efflux system subunit MdtB
22	7	56412984	6809991	GXSPA_0675	GZSPA_0672	JXSPA_0672	YNSPA_0679	ZJSPA_0684	glycosyl transferase
23	7	3178979	6810003	GXSPA_0687	GZSPA_0684	JXSPA_0684	YNSPA_0691	ZJSPA_0696	putative UDP-glucose lipid carrier transferase
24	7	3178852	6810004	GXSPA_0690	GZSPA_0686	JXSPA_0686	YNSPA_0693	ZJSPA_0698	pyruvyl transferase
25	7	3177153	6810006	GXSPA_0693	GZSPA_0689	JXSPA_0689	YNSPA_0696	ZJSPA_0701	UTP--glucose-1-phosphate uridylyltransferase subunit GalF
26	7	3178057	6810036	GXSPA_0726	GZSPA_0722	JXSPA_0722	YNSPA_0729	ZJSPA_0734	secreted effector protein
27	7	3178916	6813587	GXSPA_0727	GZSPA_0723	JXSPA_0723	YNSPA_0730	ZJSPA_0735	thiosulfate reductase
28	7	3176716	6810038	GXSPA_0730	GZSPA_0726	JXSPA_0726	YNSPA_0733	ZJSPA_0738	D-alanyl-D-alanine carboxypeptidase
29	7	3177649	6810063	GXSPA_0757	GZSPA_0753	JXSPA_0753	YNSPA_0760	ZJSPA_0765	cobyrinic acid a,c-diamide synthase
30	7	3175589	6810098	GXSPA_0794	GZSPA_0790	JXSPA_0791	YNSPA_0797	ZJSPA_0802	outer membrane protein N
31	7	3178157	6810132	GXSPA_0830	GZSPA_0826	JXSPA_0826	YNSPA_0833	ZJSPA_0837	lysine-N-methylase
32	7	3175227	6810165	GXSPA_0865	GZSPA_0862	JXSPA_0861	YNSPA_0868	ZJSPA_0873	methyl-accepting chemotaxis protein II
33	7	3175553	6810202	GXSPA_0902	GZSPA_0900	JXSPA_0898	YNSPA_0905	ZJSPA_0911	DNA damage-inducible protein YebG
34	7	3175927	6810212	GXSPA_0913	GZSPA_0911	JXSPA_0909	YNSPA_0916	ZJSPA_0922	integrase
35	7	56413212	6810217	GXSPA_0918	GZSPA_0916	JXSPA_0914	YNSPA_0921	ZJSPA_0927	phage integrase protein
36	7	3178566	197362161	GXSPA_0944	GZSPA_0942	JXSPA_0940	YNSPA_0947	ZJSPA_0954	solute/DNA competence effector
37	7	3178062	6810290	GXSPA_0992	GZSPA_0990	JXSPA_0988	YNSPA_0995	ZJSPA_1002	YcgR family protein
38	7	3178212	6810302	GXSPA_1004	GZSPA_1002	JXSPA_1000	YNSPA_1007	ZJSPA_1014	hydrogenase-1 small subunit
39	7	3177864	6810317	GXSPA_1020	GZSPA_1019	JXSPA_1016	YNSPA_1023	ZJSPA_1030	cation transport regulator
40	7	3174782	6810383	GXSPA_1093	GZSPA_1091	JXSPA_1088	YNSPA_1095	ZJSPA_1102	inner membrane protein
41	7	3177392	6810395	GXSPA_1102	GZSPA_1100	JXSPA_1097	YNSPA_1104	ZJSPA_1111	DNA-invertase (fragment)
42	7	3175797	6810412	GXSPA_1119	GZSPA_1117	JXSPA_1114	YNSPA_1121	ZJSPA_1128	2'-hydroxyisoflavone reductase
43	7	3178759	6810418	GXSPA_1125	GZSPA_1123	JXSPA_1120	YNSPA_1127	ZJSPA_1134	putative cytoplasmic protein
44	7	3175378	6810421	GXSPA_1128	GZSPA_1126	JXSPA_1123	YNSPA_1130	ZJSPA_1137	invasin-like protein
45	7	3175282	6810433	GXSPA_1140	GZSPA_1138	JXSPA_1136	YNSPA_1142	ZJSPA_1149	methyl-accepting chemotaxis protein
46	7	3178997	6810467	GXSPA_1174	GZSPA_1172	JXSPA_1170	YNSPA_1176	ZJSPA_1184	benzoate membrane transport protein
47	7	3175014	6810470	GXSPA_1177	GZSPA_1175	JXSPA_1173	YNSPA_1179	ZJSPA_1187	secreted effector protein
48	7	3179023	6810493	GXSPA_1201	GZSPA_1198	JXSPA_1196	YNSPA_1202	ZJSPA_1210	nitrate reductase 2 delta subunit
49	7	3176935	6810510	GXSPA_1222	GZSPA_1217	JXSPA_1215	YNSPA_1221	ZJSPA_1231	hypothetical protein
50	7	3177166	6810517	GXSPA_1229	GZSPA_1224	JXSPA_1222	YNSPA_1228	ZJSPA_1238	Na+/H+ antiporter
51	7	3178941	6810524	GXSPA_1237	GZSPA_1232	JXSPA_1231	YNSPA_1236	ZJSPA_1246	hydrogenase protein
52	7	3176055	6810567	GXSPA_1280	GZSPA_1275	JXSPA_1274	YNSPA_1280	ZJSPA_1289	putative voltage-gated ClC-type chloride channel ClcB
53	7	3178036	6810573	GXSPA_1287	GZSPA_1282	JXSPA_1281	YNSPA_1287	ZJSPA_1296	multidrug efflux system protein MdtI
54	7	3174636	6810583	GXSPA_1297	GZSPA_1292	JXSPA_1291	YNSPA_1297	ZJSPA_1306	hypothetical protein
55	7	3177728	6810594	GXSPA_1307	GZSPA_1302	JXSPA_1301	YNSPA_1307	ZJSPA_1316	adenosine deaminase
56	7	3175390	6810670	GXSPA_1385	GZSPA_1377	JXSPA_1379	YNSPA_1384	ZJSPA_1394	tetrathionate reductase complex subunit B
57	7	3176323	6810672	GXSPA_1388	GZSPA_1380	JXSPA_1382	YNSPA_1387	ZJSPA_1397	regulatory protein
58	7	3177169	6810682	GXSPA_1398	GZSPA_1390	JXSPA_1392	YNSPA_1399	ZJSPA_1409	bifunctional cysteine desulfurase/selenocysteine lyase
59	7	3176097	6810683	GXSPA_1399	GZSPA_1391	JXSPA_1393	YNSPA_1400	ZJSPA_1410	cysteine desulfurase activator complex subunit SufD
60	7	3176840	197362651	GXSPA_1473	GZSPA_1464	JXSPA_1467	YNSPA_1474	ZJSPA_1484	serine protein kinase, PrkA
61	7	3178316	6810790	GXSPA_1509	GZSPA_1500	JXSPA_1503	YNSPA_1510	ZJSPA_1521	hypothetical protein
62	7	3177757	6810843	GXSPA_1562	GZSPA_1551	JXSPA_1554	YNSPA_1561	ZJSPA_1572	ferric-rhodotorulic acid outer membrane transporter
63	7	3175690	6810881	GXSPA_1602	GZSPA_1590	JXSPA_1592	YNSPA_1600	ZJSPA_1612	hypothetical protein
64	7	3175654	6810904	GXSPA_1626	GZSPA_1614	JXSPA_1616	YNSPA_1624	ZJSPA_1636	curli assembly protein CsgF
65	7	3176965	6810912	GXSPA_1636	GZSPA_1624	JXSPA_1626	YNSPA_1634	ZJSPA_1646	N-acetylneuraminic acid mutarotase
66	7	3176548	6810927	GXSPA_1651	GZSPA_1640	JXSPA_1641	YNSPA_1649	ZJSPA_1661	membrane protein, suppressor for copper-sensitivity B
67	7	3178292	6810939	GXSPA_1664	GZSPA_1653	JXSPA_1654	YNSPA_1662	ZJSPA_1674	4-hydroxyphenylacetate degradation bifunctionalisomerase/decarboxylase
68	7	3176205	6810945	GXSPA_1671	GZSPA_1660	JXSPA_1661	YNSPA_1669	ZJSPA_1681	secreted peptidase
69	7	3177132	6810956	GXSPA_1683	GZSPA_1672	JXSPA_1673	YNSPA_1681	ZJSPA_1693	outer membrane protein
70	7	3175886	6811002	GXSPA_1730	GZSPA_1718	JXSPA_1719	YNSPA_1728	ZJSPA_1740	putative competence-like protein
71	7	3176215	6811012	GXSPA_1741	GZSPA_1729	JXSPA_1730	YNSPA_1739	ZJSPA_1751	SopD-like protein
72	7	3178142	6811017	GXSPA_1747	GZSPA_1735	JXSPA_1736	YNSPA_1745	ZJSPA_1757	anaerobic dimethyl sulfoxide reductase subunit C
73	7	3176598, 3178569	6811036, 6810229	GXSPA_0929	GZSPA_0927	JXSPA_0925	YNSPA_0932	ZJSPA_1777,ZJSPA_0938	transposase
74	7	3178753	6811104	GXSPA_1838	GZSPA_1826	JXSPA_1826	YNSPA_1837	ZJSPA_1847	threonine and homoserine efflux system
75	7	56414090	6811124	GXSPA_1860	GZSPA_1848	JXSPA_1848	YNSPA_1859	ZJSPA_1869	hypothetical protein
76	7	3175234	6811133	GXSPA_1869	GZSPA_1857	JXSPA_1857	YNSPA_1868	ZJSPA_1878	leucine-rich repeat-containing protein
77	7	3176689	6811142	GXSPA_1879	GZSPA_1867	JXSPA_1867	YNSPA_1878	ZJSPA_1888	urocanate hydratase
78	7	3177395	6811198	GXSPA_1940	GZSPA_1927	JXSPA_1927	YNSPA_1939	ZJSPA_1950	inner membrane protein
79	7	3177165	197363123	GXSPA_1979	GZSPA_1965	JXSPA_1965	YNSPA_1977	ZJSPA_1988	asparagine synthetase B
80	7	3177346	6811273	GXSPA_2021	GZSPA_2007	JXSPA_2007	YNSPA_2019	ZJSPA_2030	sensor kinase DpiB
81	7	3175168	6811282	GXSPA_2032	GZSPA_2018	JXSPA_2018	YNSPA_2030	ZJSPA_2042	zinc-dependent alcohol dehydrogenase
82	7	3174943	6811330	GXSPA_2083	GZSPA_2069	JXSPA_2068	YNSPA_2081	ZJSPA_2093	inner membrane protein
83	7	3176587	6811355	GXSPA_2108	GZSPA_2094	JXSPA_2092	YNSPA_2106	ZJSPA_2118	membrane protein FdrA
84	7	3174849	6811361	GXSPA_2115	GZSPA_2101	JXSPA_2099	YNSPA_2113	ZJSPA_2125	allantoin permease
85	7	3177303	6811380	GXSPA_2135	GZSPA_2121	JXSPA_2119	YNSPA_2133	ZJSPA_2145	inner membrane protein
86	7	3177975	6811500	GXSPA_2257	GZSPA_2243	JXSPA_2241	YNSPA_2256	ZJSPA_2269	D-alanyl-alanine synthetase A
87	7	3175080	6811517	GXSPA_2275	GZSPA_2261	JXSPA_2260	YNSPA_2274	ZJSPA_2290	cytoplasmic protein
88	7	3178863	197363414	GXSPA_2288	GZSPA_2274	JXSPA_2273	YNSPA_2288	ZJSPA_2303	inner membrane protein
89	7	3177246	6811615	GXSPA_2379	GZSPA_2364	JXSPA_2364	YNSPA_2378	ZJSPA_2333	hypothetical protein
90	7	56414573	197363505	GXSPA_2387	GZSPA_2371	JXSPA_2371	YNSPA_2385	ZJSPA_2340	hypothetical protein
91	7	3176708	6811627	GXSPA_2392	GZSPA_2376	JXSPA_2376	YNSPA_2390	ZJSPA_2345	putative fimbrial structural subunit
92	7	56414580	6811631	GXSPA_2397	GZSPA_2381	JXSPA_2381	YNSPA_2395	ZJSPA_2350	integrase core subunit
93	7	3178257	6811635	GXSPA_2400	GZSPA_2384	JXSPA_2384	YNSPA_2398	ZJSPA_2353	putative cytoplasmic protein
94	7	3177380	6811643	GXSPA_2410	GZSPA_2395	JXSPA_2396	YNSPA_2407	ZJSPA_2364	hypothetical protein
95	7	3177459	6811662	GXSPA_2430	GZSPA_2416	JXSPA_2415	YNSPA_2427	ZJSPA_2384	cytoplasmic protein
96	7	3176858	6811784	GXSPA_2563	GZSPA_2551	JXSPA_2549	YNSPA_2476	ZJSPA_2519	DNA-invertase hin
97	7	3177807	6811790	GXSPA_2569	GZSPA_2557	JXSPA_2555	YNSPA_2482	ZJSPA_2525	hypothetical protein
98	7	3177353	6811822	GXSPA_2603	GZSPA_2591	JXSPA_2589	YNSPA_2516	ZJSPA_2559	ribonucleotide-diphosphate reductase subunit beta
99	7	3176988	6811829	GXSPA_2611	GZSPA_2599	JXSPA_2597	YNSPA_2524	ZJSPA_2567	glycoporin
100	7	3178490	6811912	GXSPA_2694	GZSPA_2682	JXSPA_2681	YNSPA_2607	ZJSPA_2651	putative transposase
101	7	3178771	6811913	GXSPA_2695	GZSPA_2683	JXSPA_2682	YNSPA_2608	ZJSPA_2652	serine/threonine-specific protein phosphatase 2
102	7	3177382	6811942	GXSPA_2724	GZSPA_2712	JXSPA_2711	YNSPA_2637	ZJSPA_2681	alkaline phosphatase isozyme conversion aminopeptidase
103	7	3176144	6811949	GXSPA_2731	GZSPA_2719	JXSPA_2719	YNSPA_2644	ZJSPA_2688	CRISPR-associated protein Cse1 family
104	7	3175763	6811950	GXSPA_2732	GZSPA_2720	JXSPA_2720	YNSPA_2645	ZJSPA_2689	hypothetical protein
105	7	3176779	6811957	GXSPA_2738	GZSPA_2726	JXSPA_2726	YNSPA_2651	ZJSPA_2695	beta-lactamase family hydrolase
106	7	3175003	6811975	GXSPA_2758	GZSPA_2746	JXSPA_2746	YNSPA_2671	ZJSPA_2715	D-glucarate permease
107	7	3176769	6812042	GXSPA_2826	GZSPA_2814	JXSPA_2815	YNSPA_2740	ZJSPA_2784	outer membrane protein
108	7	3174712	6812152	GXSPA_2937	GZSPA_2925	JXSPA_2926	YNSPA_2851	ZJSPA_2895	ABC transporter periplasmic-binding protein
109	7	3174708	6812182	GXSPA_2968	GZSPA_2955	JXSPA_2957	YNSPA_2881	ZJSPA_2925	hypothetical protein
110	7	3177474	6812245	GXSPA_3035	GZSPA_3021	JXSPA_3023	YNSPA_2947	ZJSPA_2992	cytoplasmic protein
111	7	3177821	6812257	GXSPA_3047	GZSPA_3033	JXSPA_3035	YNSPA_2959	ZJSPA_3004	galactarate dehydrogenase
112	7	3175071	6812282	GXSPA_3073	GZSPA_3059	JXSPA_3061	YNSPA_2985	ZJSPA_3031	putative monooxygenase
113	7	3178055	6812355	GXSPA_3150	GZSPA_3135	JXSPA_3137	YNSPA_3061	ZJSPA_3108	membrane transporter
114	7	3176499	6812385	GXSPA_3181	GZSPA_3165	JXSPA_3167	YNSPA_3091	ZJSPA_3138	methyltransferase
115	7	3174752	6812449	GXSPA_3248	GZSPA_3232	JXSPA_3235	YNSPA_3159	ZJSPA_3205	hypothetical protein
116	7	3176142	6813465	GXSPA_3266	GZSPA_3252	JXSPA_3254	YNSPA_3178	ZJSPA_3224	outer membrane lipoprotein
117	7	3176155	6812479	GXSPA_3278	GZSPA_3264	JXSPA_3266	YNSPA_3190	ZJSPA_3236	HofM protein
118	7	3176000	6812517	GXSPA_3317	GZSPA_3302	JXSPA_3305	YNSPA_3230	ZJSPA_3274	dehydrogenase
119	7	56415505	6812575	GXSPA_3379	GZSPA_3364	JXSPA_3367	YNSPA_3293	ZJSPA_3337	phosphosugar-binding protein
120	7	3178053	6812581	GXSPA_3385	GZSPA_3370	JXSPA_3373	YNSPA_3299	ZJSPA_3343	transcriptional regulator
121	7	3178026	6812583	GXSPA_3388	GZSPA_3373	JXSPA_3376	YNSPA_3302	ZJSPA_3346	inner membrane protein
122	7	3175251	6812592	GXSPA_3398	GZSPA_3382	JXSPA_3385	YNSPA_3311	ZJSPA_3356	cellulose synthase catalytic subunit
123	7	3177208	6812615	GXSPA_3423	GZSPA_3406	JXSPA_3409	YNSPA_3335	ZJSPA_3380	transcriptional regulator
124	7	56415554	6812629	GXSPA_3436	GZSPA_3419	JXSPA_3422	YNSPA_3348	ZJSPA_3393	xylose isomerase
125	7	3178995	6812638	GXSPA_3446	GZSPA_3429	JXSPA_3432	YNSPA_3358	ZJSPA_3403	YiaX1
126	7	3177863	6812655	GXSPA_3463	GZSPA_3446	JXSPA_3450	YNSPA_3375	ZJSPA_3420	mannitol repressor protein
127	7	3178095	6812712	GXSPA_3524	GZSPA_3507	JXSPA_3510	YNSPA_3437	ZJSPA_3481	alpha-xylosidase YicI
128	7	3176787	6812716	GXSPA_3528	GZSPA_3511	JXSPA_3514	YNSPA_3441	ZJSPA_3485	hypothetical protein
129	7	3175506	6812739	GXSPA_3552	GZSPA_3535	JXSPA_3538	YNSPA_3465	ZJSPA_3509	putative cytoplasmic protein
130	7	3176568	6812749	GXSPA_3562	GZSPA_3545	JXSPA_3548	YNSPA_3475	ZJSPA_3519	sugar phosphate antiporter
131	7	3176815	6813603	GXSPA_3563	GZSPA_3546	JXSPA_3549	YNSPA_3476	ZJSPA_3520	regulatory protein UhpC
132	7	3177794	6813602	GXSPA_3564	GZSPA_3547	JXSPA_3550	YNSPA_3477	ZJSPA_3521	sensory histidine kinase UhpB
133	7	3178918	6812874	GXSPA_3703	GZSPA_3688	JXSPA_3690	YNSPA_3609	ZJSPA_3650	hypothetical protein
134	7	3175022	6812909	GXSPA_3738	GZSPA_3724	JXSPA_3726	YNSPA_3644	ZJSPA_3685	transferase
135	7	3178160	6812959	GXSPA_3789	GZSPA_3775	JXSPA_3777	YNSPA_3697	ZJSPA_3736	formate dehydrogenase alpha subunit
136	7	3175565	6812987	GXSPA_3819	GZSPA_3843	JXSPA_3847	YNSPA_3765	ZJSPA_3803	Na+/galactoside symporter
137	7	3177981	6813004	GXSPA_3836	GZSPA_3860	JXSPA_3864	YNSPA_3782	ZJSPA_3820	inner membrane protein
138	7	3175666	6813026	GXSPA_3861	GZSPA_3886	JXSPA_3889	YNSPA_3807	ZJSPA_3845	serine hydroxymethyltransferase
139	7	3176226	6813085	GXSPA_3921	GZSPA_3945	JXSPA_3949	YNSPA_3866	ZJSPA_3904	bifunctional isocitrate dehydrogenase kinase/phosphatase protein
140	7	3175387	6813151	GXSPA_3990	GZSPA_4012	JXSPA_4016	YNSPA_3933	ZJSPA_3972	inner membrane protein
141	7	3177978	6813181	GXSPA_4022	GZSPA_4044	JXSPA_4048	YNSPA_3965	ZJSPA_4004	sensory histidine kinase DcuS
142	7	3178665	6813476	GXSPA_4023	GZSPA_4045	JXSPA_4049	YNSPA_3966	ZJSPA_4005	anaerobic dimethyl sulfoxide reductase chain a
143	7	3178198	6813220	GXSPA_4063	GZSPA_4086	JXSPA_4090	YNSPA_4006	ZJSPA_4046	predicted mechanosensitive channel
144	7	3178452	6813266	GXSPA_4111	GZSPA_4133	JXSPA_4141	YNSPA_4055	ZJSPA_4097	lipoprotein
145	7	3176258	6813285	GXSPA_4130	GZSPA_4152	JXSPA_4159	YNSPA_4073	ZJSPA_4116	murein peptide ligase
146	7	3177236	6813305	GXSPA_4152	GZSPA_4172	JXSPA_4179	YNSPA_4093	ZJSPA_4137	magnesium-transporting ATPase MgtA
147	7	3176940	6813340	GXSPA_4189	GZSPA_4208	JXSPA_4215	YNSPA_4129	ZJSPA_4173	glycoprotein 3
148	7	3178888	6813341	GXSPA_4190	GZSPA_4209	JXSPA_4216	YNSPA_4130	ZJSPA_4174	phage DNA binding protein
149	7	3176381	6813348	GXSPA_4197	GZSPA_4216	JXSPA_4223	YNSPA_4137	ZJSPA_4181	transposase
150	7	3177568	6813349	GXSPA_4198	GZSPA_4217	JXSPA_4224	YNSPA_4138	ZJSPA_4182	IS3 transposase OrfA
151	7	3177012	6813355	GXSPA_4204	GZSPA_4223	JXSPA_4230	YNSPA_4144	ZJSPA_4188	regulatory protein
152	7	3176166	6813386	GXSPA_4236	GZSPA_4255	JXSPA_4262	YNSPA_4177	ZJSPA_4221	multidrug resistance protein MdtM
153	7	3176726	197361218	GXSPA_4311	GZSPA_4329	JXSPA_4337	YNSPA_4251	ZJSPA_4295	amino-acid transport protein
154	7	3178184	6809295	GXSPA_4323	GZSPA_4341	JXSPA_4349	YNSPA_4263	ZJSPA_4307	chitinase
155	7	3177117	6809303	GXSPA_4331	GZSPA_4349	JXSPA_4357	YNSPA_4271	ZJSPA_4315	fimbrial subunit
156	7	3178599	6809312	GXSPA_4341	GZSPA_4359	JXSPA_4367	YNSPA_4281	ZJSPA_4325	arylsulfatase
157	6	3177461	6812949	GXSPA_3778	GZSPA_3764	JXSPA_3766	YNSPA_3686	-	ribonuclease BN
158	6	3176849, 56412855	6813482, 6812771	GXSPA_3590	GZSPA_3573	-	YNSPA_0548	ZJSPA_0550	cytochrome c-type biogenesis protein H1
159	6	-	6810056	GXSPA_0749	GZSPA_0745	JXSPA_0745	YNSPA_0752	ZJSPA_0757	PduG protein
160	6	3176743	-	GXSPA_0755	GZSPA_0751	JXSPA_0751	YNSPA_0758	ZJSPA_0763	propanediol utilization propanediol diffusion facilitator
161	6	3177082	-	GXSPA_0779	GZSPA_0775	JXSPA_0776	YNSPA_0782	ZJSPA_0787	hypothetical protein
162	6	56413209	197362135	GXSPA_0915	-	JXSPA_0911	YNSPA_0918	ZJSPA_0924	hypothetical protein
163	6	-	6810218	GXSPA_0919	GZSPA_0917	JXSPA_0915	YNSPA_0922	ZJSPA_0928	RecT protein
164	6	-	6810359	GXSPA_1066	GZSPA_1064	JXSPA_1061	YNSPA_1068	ZJSPA_1075	bifunctional glutamine amidotransferase/anthranilate phosphoribosyltransferase
165	6	-	6810592	GXSPA_1306	GZSPA_1301	JXSPA_1300	YNSPA_1306	ZJSPA_1315	hypothetical protein
166	6	-	6810754	GXSPA_1470	GZSPA_1461	JXSPA_1464	YNSPA_1471	ZJSPA_1481	oxidoreductase
167	6	-	6811241	GXSPA_1987	GZSPA_1973	JXSPA_1973	YNSPA_1985	ZJSPA_1996	glutamate/aspartate transporter
168	6	-	6811326	GXSPA_2079	GZSPA_2065	JXSPA_2064	YNSPA_2076	ZJSPA_2088	inner membrane proton/cation antiporter
169	6	-	6811327	GXSPA_2080	GZSPA_2066	JXSPA_2065	YNSPA_2077	ZJSPA_2089	hypothetical protein
170	6	3175447	6811332	GXSPA_2085	GZSPA_2071	-	YNSPA_2083	ZJSPA_2095	hypothetical protein
171	6	-	6811333	GXSPA_2086	GZSPA_2072	JXSPA_2070	YNSPA_2084	ZJSPA_2096	integrase
172	6	-	6811526	GXSPA_2283	GZSPA_2269	JXSPA_2268	YNSPA_2283	ZJSPA_2298	hypothetical protein
173	6	-	6811625	GXSPA_2390	GZSPA_2374	JXSPA_2374	YNSPA_2388	ZJSPA_2343	TnpA
174	6	-	6811629	GXSPA_2395	GZSPA_2379	JXSPA_2379	YNSPA_2393	ZJSPA_2348	saf-pilin pilus formation protein
175	6	3178279	6811762	GXSPA_2530	GZSPA_2518	JXSPA_2516	-	ZJSPA_2484	hypothetical protein
176	6	-	6813539	GXSPA_2904	GZSPA_2892	JXSPA_2893	YNSPA_2818	ZJSPA_2862	hypothetical protein
177	6	-	6812119	GXSPA_2905	GZSPA_2893	JXSPA_2894	YNSPA_2819	ZJSPA_2863	hypothetical protein
178	6	-	6812123	GXSPA_2909	GZSPA_2897	JXSPA_2898	YNSPA_2823	ZJSPA_2867	hypothetical protein
179	6	3174678	-	GXSPA_3037	GZSPA_3023	JXSPA_3025	YNSPA_2949	ZJSPA_2994	transport protein
180	6	-	6812549	GXSPA_3353	GZSPA_3338	JXSPA_3341	YNSPA_3267	ZJSPA_3310	periplasmic protein, predicted lipoprotein
181	6	3178022	-	GXSPA_3415	GZSPA_3398	JXSPA_3401	YNSPA_3327	ZJSPA_3372	phosphoethanolamine transferase
182	6	-	6812621	GXSPA_3429	GZSPA_3412	JXSPA_3415	YNSPA_3341	ZJSPA_3386	hypothetical protein
183	6	3174648	6812658	GXSPA_3467	GZSPA_3450	-	YNSPA_3379	ZJSPA_3424	inner membrane protein
184	6	-	6812718	GXSPA_3530	GZSPA_3513	JXSPA_3516	YNSPA_3443	ZJSPA_3487	hypothetical protein
185	6	-	6812719	GXSPA_3531	GZSPA_3514	JXSPA_3517	YNSPA_3444	ZJSPA_3488	transposase
186	6	3174717	-	GXSPA_3605	GZSPA_3589	JXSPA_3591	YNSPA_3511	ZJSPA_3552	hypothetical protein
187	6	3177501	-	GXSPA_3651	GZSPA_3636	JXSPA_3637	YNSPA_3557	ZJSPA_3598	ribose ABC transporter permease protein
188	6	3178263	-	GXSPA_3654	GZSPA_3639	JXSPA_3640	YNSPA_3560	ZJSPA_3601	transcriptional repressor RbsR
189	6	3178738	-	GXSPA_3677	GZSPA_3662	JXSPA_3664	YNSPA_3583	ZJSPA_3624	ATP-dependent RNA helicase RhlB
190	6	-	6812932	GXSPA_3761	GZSPA_3747	JXSPA_3749	YNSPA_3668	ZJSPA_3708	hydrolase, Cof family
191	6	-	6812991	GXSPA_3823	GZSPA_3847	JXSPA_3851	YNSPA_3769	ZJSPA_3807	putative periplasmic protein
192	6	-	6813239	GXSPA_4085	GZSPA_4108	JXSPA_4112	YNSPA_4028	ZJSPA_4068	hypothetical protein
193	6	-	6813353	GXSPA_4202	GZSPA_4221	JXSPA_4228	YNSPA_4142	ZJSPA_4186	fimbrial adhesin subunit
194	4	A_N69	B_N73	GXSPA_3016	-	JXSPA_3003	-	-	hypothetical protein
195	4	-	-	GXSPA_1767	GZSPA_1755	JXSPA_1756	YNSPA_1766	-	transposase
196	4	-	-	GXSPA_2353	GZSPA_2339	JXSPA_2339	YNSPA_2353	-	hypothetical protein
197	4	161936197	6813244	-	-	JXSPA_4118	-	ZJSPA_4073	isovaleryl CoA dehydrogenase
198	3	-	-	GXSPA_3596	GZSPA_3580	JXSPA_3582	-	-	heme exporter protein
199	3	-	-	GXSPA_0209	-	-	YNSPA_0207	ZJSPA_0210	neutral amino-acid efflux protein
200	2	56414987	197363916	-	-	-	-	-	peptide chain release factor 2
201	2	3175413	6809341	-	-	-	-	-	hypothetical protein
202	2	3178926	6809532	-	-	-	-	-	hypothetical protein
203	2	3178824, 3174915	6810390	-	-	-	-	-	bacteriophage protein
204	2	3178471	6811524	-	-	-	-	-	hypothetical protein
205	2	56415504	6812574	-	-	-	-	-	hypothetical protein
206	2	3175866	6813365	-	-	-	-	-	hypothetical protein
207	2	3178686	6813450	-	-	-	-	-	secreted protein
208	2	3176016	6813649	-	-	-	-	-	hypothetical protein
209	2	A_N85	B_N93	-	-	-	-	-	hypothetical protein
210	2	-	6810800	GXSPA_1518	-	-	-	-	putative transposase
211	2	-	-	GXSPA_0818	GZSPA_0814	-	-	-	flagellar MS-ring protein
212	2	-	-	GXSPA_1713	GZSPA_1701	-	-	-	asparaginyl-tRNA synthetase
213	2	-	-	GXSPA_3648	GZSPA_3633	-	-	-	potassium transport protein Kup
214	2	-	-	GXSPA_4090	GZSPA_4113	-	-	-	hypothetical protein
215	2	-	-	GXSPA_4257	GZSPA_4275	-	-	-	primosomal protein DnaI
216	2	-	-	GXSPA_0474	-	JXSPA_0472	-	-	NADH dehydrogenase I subunit F
217	2	-	-	-	GZSPA_3251	JXSPA_3253	-	-	surface-exposed virulence protein
218	2	-	-	-	GZSPA_3897	JXSPA_3900	-	-	N-acetyl-gamma-glutamyl-phosphate reductase
219	2	-	-	GXSPA_1749	-	-	YNSPA_1747	-	anaerobic dimethyl sulfoxide reductase subunit A
220	2	-	-	-	GZSPA_1785	-	YNSPA_1796	-	putrescine ABC transporter membrane protein
221	2	-	-	GXSPA_1832	-	-	YNSPA_1831	-	L,D-transpeptidase
222	2	-	-	-	-	JXSPA_3172	YNSPA_3096	-	transmembrane protein affecting septum formation and cell membrane permeability
223	2	-	-	GXSPA_3283	-	-	YNSPA_3196	-	ribosome-associated heat shock protein Hsp15
224	2	-	-	-	GZSPA_1006	-	-	ZJSPA_1018	hypothetical protein
225	2	-	-	GXSPA_1202	-	-	-	ZJSPA_1211	respiratory nitrate reductase 2 subunit beta
226	2	-	-	-	-	JXSPA_1307	-	ZJSPA_1322	electron transport complex protein RnfC
227	2	-	-	-	-	-	YNSPA_1919	ZJSPA_1929	dihydrolipoamide succinyltransferase
228	2	-	-	-	-	JXSPA_2069	-	ZJSPA_2094	transposase
229	2	-	-	-	GZSPA_2582	-	-	ZJSPA_2550	inner membrane protein
230	2	-	-	-	-	-	YNSPA_3381	ZJSPA_3425	L-lactate transport
231	2	-	-	-	-	-	YNSPA_3676	ZJSPA_3716	membrane permease
232	2	-	-	GXSPA_4057	-	-	-	ZJSPA_4039	fumarate reductase subunit C
233	2	-	-	-	GZSPA_4147	-	-	ZJSPA_4111	sugar transporter
234	2	-	-	GXSPA_4178	-	-	-	ZJSPA_4162	GntP family, L-idonate transport protein
235	1	3175902	-	-	-	-	-	-	hypothetical protein
236	1	3176162	-	-	-	-	-	-	multidrug efflux system subunit MdtA
237	1	56415840	-	-	-	-	-	-	hypothetical protein
238	1	-	6809714	-	-	-	-	-	hypothetical protein
239	1	-	6809719	-	-	-	-	-	hypothetical protein
240	1	-	6809962	-	-	-	-	-	hypothetical protein
241	1	-	6810214	-	-	-	-	-	hypothetical protein
242	1	-	6810219	-	-	-	-	-	hypothetical protein
243	1	-	6810392	-	-	-	-	-	hypothetical protein
244	1	-	6810394	-	-	-	-	-	hypothetical protein
245	1	-	6810499	-	-	-	-	-	hypothetical protein
246	1	-	6810593	-	-	-	-	-	hypothetical protein
247	1	-	6812125	-	-	-	-	-	hypothetical protein
248	1	-	6812598	-	-	-	-	-	cystathionine gamma-synthase
249	1	-	-	GXSPA_0117	-	-	-	-	carbonic anhydrase
250	1	-	-	GXSPA_0152	-	-	-	-	chloride channel protein
251	1	-	-	GXSPA_0173	-	-	-	-	outer membrane protein assembly factor YaeT
252	1	-	-	GXSPA_0375	-	-	-	-	cell division protein ZipA
253	1	-	-	GXSPA_0425	-	-	-	-	putative transmembrane transporter
254	1	-	-	GXSPA_0457	-	-	-	-	transketolase C-terminal section
255	1	-	-	GXSPA_0591	-	-	-	-	vancomycin resistance protein
256	1	-	-	GXSPA_0636	-	-	-	-	lipid kinase
257	1	-	-	GXSPA_0689	-	-	-	-	colanic acid exporter
258	1	-	-	GXSPA_0699	-	-	-	-	glucose-1-phosphate cytidylyltransferase
259	1	-	-	GXSPA_0996	-	-	-	-	membrane protein
260	1	-	-	GXSPA_1024	-	-	-	-	nitrate/nitrite sensor protein NarX
261	1	-	-	GXSPA_1062	-	-	-	-	cytoplasmic protein
262	1	-	-	GXSPA_1181	-	-	-	-	regulatory protein
263	1	-	-	GXSPA_1193	-	-	-	-	hypothetical protein
264	1	-	-	GXSPA_1206	-	-	-	-	regulatory protein
265	1	-	-	GXSPA_1303	-	-	-	-	fumarate hydratase class I, aerobic
266	1	-	-	GXSPA_1324	-	-	-	-	anhydro-N-acetylmuramic acid kinase
267	1	-	-	GXSPA_1379	-	-	-	-	two-component response regulator
268	1	-	-	GXSPA_1549	-	-	-	-	transcription-repair coupling factor
269	1	-	-	GXSPA_1575	-	-	-	-	hypothetical protein
270	1	-	-	GXSPA_1703	-	-	-	-	23S rRNA m(2)G2445 methyltransferase
271	1	-	-	GXSPA_1822	-	-	-	-	hypothetical protein
272	1	-	-	GXSPA_1891	-	-	-	-	hypothetical protein
273	1	-	-	GXSPA_1935	-	-	-	-	hypothetical protein
274	1	-	-	GXSPA_1945	-	-	-	-	carboxylase
275	1	-	-	GXSPA_1948	-	-	-	-	PTR2-family transport protein
276	1	-	-	GXSPA_1991	-	-	-	-	hypothetical protein
277	1	-	-	GXSPA_2038	-	-	-	-	alkyl hydroperoxide reductase subunit F
278	1	-	-	GXSPA_2170	-	-	-	-	lipoprotein
279	1	-	-	GXSPA_2298	-	-	-	-	outer membrane protein
280	1	-	-	GXSPA_2362	-	-	-	-	DNA-binding transcriptional regulator Crl
281	1	-	-	GXSPA_2382	-	-	-	-	outer membrane fimbrial user protein
282	1	-	-	GXSPA_2396	-	-	-	-	lipoprotein
283	1	-	-	GXSPA_2404	-	-	-	-	Rhs-family protein
284	1	-	-	GXSPA_2422	-	-	-	-	putative cytoplasmic protein
285	1	-	-	GXSPA_2663	-	-	-	-	hypothetical protein
286	1	-	-	GXSPA_2712	-	-	-	-	RNA polymerase sigma factor RpoS
287	1	-	-	GXSPA_2807	-	-	-	-	diaminopimelate decarboxylase
288	1	-	-	GXSPA_2942	-	-	-	-	hydrogenase 2 large subunit
289	1	-	-	GXSPA_2984	-	-	-	-	putative lipoprotein
290	1	-	-	GXSPA_3009	-	-	-	-	RNA polymerase sigma factor RpoD
291	1	-	-	GXSPA_3088	-	-	-	-	ATP-dependent metalloprotease
292	1	-	-	GXSPA_3107	-	-	-	-	ABC transporter ATP-binding protein YrbF
293	1	-	-	GXSPA_3155	-	-	-	-	arginine repressor
294	1	-	-	GXSPA_3287	-	-	-	-	phosphoenolpyruvate carboxykinase
295	1	-	-	GXSPA_3299	-	-	-	-	high-affinity gluconate transporter
296	1	-	-	GXSPA_3393	-	-	-	-	hypothetical protein
297	1	-	-	GXSPA_3406	-	-	-	-	amino acid permease
298	1	-	-	GXSPA_3450	-	-	-	-	L-xylulose kinase
299	1	-	-	GXSPA_3556	-	-	-	-	carbohydrate kinase
300	1	-	-	GXSPA_3658	-	-	-	-	uncharacterized protein YifE
301	1	-	-	GXSPA_3872	-	-	-	-	hypothetical protein
302	1	-	-	GXSPA_3885	-	-	-	-	pantothenate kinase
303	1	-	-	GXSPA_3964	-	-	-	-	aromatic amino acid aminotransferase
304	1	-	-	GXSPA_3979	-	-	-	-	cyclic diguanylate phosphodiesterase (EAL) domain-containing protein
305	1	-	-	GXSPA_3981	-	-	-	-	hypothetical protein
306	1	-	-	GXSPA_4032	-	-	-	-	AraC family transcription regulator
307	1	-	-	GXSPA_4092	-	-	-	-	L-ascorbate 6-phosphate lactonase
308	1	-	-	GXSPA_4122	-	-	-	-	outer membrane protein
309	1	-	-	GXSPA_4124	-	-	-	-	periplasmic protein
310	1	-	-	GXSPA_4148	-	-	-	-	trehalose-6-phosphate hydrolase
311	1	-	-	GXSPA_4159	-	-	-	-	hypothetical protein
312	1	-	-	GXSPA_4179	-	-	-	-	gluconate 5-dehydrogenase
313	1	-	-	GXSPA_4251	-	-	-	-	hypothetical protein
314	1	-	-	GXSPA_4252	-	-	-	-	hypothetical protein
315	1	-	-	GXSPA_4352	-	-	-	-	hypothetical protein
316	1	-	-	GXSPA_4358	-	-	-	-	nitrite reductase
317	1	-	-	-	GZSPA_0024	-	-	-	putative secreted protein
318	1	-	-	-	GZSPA_0111	-	-	-	transcriptional regulator
319	1	-	-	-	GZSPA_0322	-	-	-	aminoglycoside/multidrug efflux system
320	1	-	-	-	GZSPA_0770	-	-	-	adenosylcobinamide kinase/adenosylcobinamide-phosphate guanylyltransferase
321	1	-	-	-	GZSPA_0825	-	-	-	flagellin
322	1	-	-	-	GZSPA_0868	-	-	-	flagellar biosynthesis protein FlhB
323	1	-	-	-	GZSPA_0969	-	-	-	lipoprotein
324	1	-	-	-	GZSPA_1012	-	-	-	peptide chain release factor 1
325	1	-	-	-	GZSPA_1242	-	-	-	succinate semialdehyde dehydrogenase
326	1	-	-	-	GZSPA_1626	-	-	-	hypothetical protein
327	1	-	-	-	GZSPA_1855	-	-	-	molybdenum cofactor biosynthesis protein A
328	1	-	-	-	GZSPA_2028	-	-	-	lysR family transcriptional regulator
329	1	-	-	-	GZSPA_2119	-	-	-	transport protein
330	1	-	-	-	GZSPA_2216	-	-	-	preprotein translocase subunit SecD
331	1	-	-	-	GZSPA_2346	-	-	-	gamma-glutamyl kinase
332	1	-	-	-	GZSPA_2397	-	-	-	inner membrane protein
333	1	-	-	-	GZSPA_2424	-	-	-	ribonuclease H
334	1	-	-	-	GZSPA_2461	-	-	-	large repetitive protein
335	1	-	-	-	GZSPA_2476	-	-	-	hypothetical protein
336	1	-	-	-	GZSPA_2532	-	-	-	phage terminase subunit
337	1	-	-	-	GZSPA_2806	-	-	-	nickel/cobalt efflux protein RcnA
338	1	-	-	-	GZSPA_2908	-	-	-	cytoplasmic protein
339	1	-	-	-	GZSPA_3027	-	-	-	threonine/serine transporter TdcC
340	1	-	-	-	GZSPA_3349	-	-	-	DNA-binding protein
341	1	-	-	-	GZSPA_3467	-	-	-	L-threonine 3-dehydrogenase
342	1	-	-	-	GZSPA_3705	-	-	-	lysophospholipase L2
343	1	-	-	-	GZSPA_3885	-	-	-	5'-Nucleotidase domain protein
344	1	-	-	-	GZSPA_3934	-	-	-	transcriptional regulator HU subunit alpha
345	1	-	-	-	GZSPA_4041	-	-	-	anaerobic C4-dicarboxylate transporter
346	1	-	-	-	GZSPA_4066	-	-	-	inner membrane protein YjeH
347	1	-	-	-	-	JXSPA_0180	-	-	DNA polymerase III subunit alpha
348	1	-	-	-	-	JXSPA_0573	-	-	lysine transporter
349	1	-	-	-	-	JXSPA_0582	-	-	DNA-binding transcriptional regulator GalS
350	1	-	-	-	-	JXSPA_0696	-	-	CDP-glucose 4,6-dehydratase
351	1	-	-	-	-	JXSPA_0700	-	-	O-antigen transporter
352	1	-	-	-	-	JXSPA_0719	-	-	transcriptional regulator
353	1	-	-	-	-	JXSPA_0770	-	-	cobyric acid synthase
354	1	-	-	-	-	JXSPA_0944	-	-	transcriptional regulator KdgR
355	1	-	-	-	-	JXSPA_1011	-	-	N5-glutamine S-adenosyl-L-methionine-dependent methyltransferase
356	1	-	-	-	-	JXSPA_1132	-	-	universal stress protein UspE
357	1	-	-	-	-	JXSPA_1227	-	-	hydrogenase-1 large subunit
358	1	-	-	-	-	JXSPA_1268	-	-	dimethyl sulfoxide reductase subunit
359	1	-	-	-	-	JXSPA_1601	-	-	lipid A biosynthesis lauroyl acyltransferase
360	1	-	-	-	-	JXSPA_2133	-	-	heat shock protein 90
361	1	-	-	-	-	JXSPA_2219	-	-	peroxidase
362	1	-	-	-	-	JXSPA_2275	-	-	rtn protein
363	1	-	-	-	-	JXSPA_2335	-	-	gp49
364	1	-	-	-	-	JXSPA_2390	-	-	Rhs family protein
365	1	-	-	-	-	JXSPA_2452	-	-	hypothetical protein
366	1	-	-	-	-	JXSPA_2672	-	-	virulence associated secretory protein
367	1	-	-	-	-	JXSPA_2712	-	-	hypothetical protein
368	1	-	-	-	-	JXSPA_2800	-	-	5-keto-4-deoxyuronate isomerase
369	1	-	-	-	-	JXSPA_2950	-	-	membrane transporter
370	1	-	-	-	-	JXSPA_3131	-	-	hypothetical protein
371	1	-	-	-	-	JXSPA_3289	-	-	maltodextrin phosphorylase
372	1	-	-	-	-	JXSPA_3435	-	-	2,3-diketo-l-gulonate trap transporter large permease protein yian
373	1	-	-	-	-	JXSPA_3454	-	-	L-lactate dehydrogenase
374	1	-	-	-	-	JXSPA_3471	-	-	ADP-L-glycero-D-mannoheptose-6-epimerase
375	1	-	-	-	-	JXSPA_3507	-	-	hypothetical protein
376	1	-	-	-	-	JXSPA_3575	-	-	hypothetical protein
377	1	-	-	-	-	JXSPA_3578	-	-	cytochrome c-type biogenesis protein
378	1	-	-	-	-	JXSPA_3656	-	-	ketol-acid reductoisomerase
379	1	-	-	-	-	JXSPA_3658	-	-	cyclic nucleotide-binding domain-containing protein
380	1	-	-	-	-	JXSPA_3697	-	-	DNA-dependent helicase II
381	1	-	-	-	-	JXSPA_3703	-	-	phospholipase A
382	1	-	-	-	-	JXSPA_3813	-	-	hypothetical protein
383	1	-	-	-	-	JXSPA_3833	-	-	hypothetical protein
384	1	-	-	-	-	JXSPA_4067	-	-	anaerobic C4-dicarboxylate transporter
385	1	-	-	-	-	JXSPA_4116	-	-	glutathionylspermidine synthase
386	1	-	-	-	-	JXSPA_4277	-	-	carbon starvation family protein
387	1	-	-	-	-	JXSPA_4278	-	-	hypothetical protein
388	1	-	-	-	-	JXSPA_4296	-	-	peptide chain release factor 3
389	1	-	-	-	-	JXSPA_4313	-	-	ABC transporter ATP-binding protein
390	1	-	-	-	-	-	YNSPA_0318	-	zinc protease
391	1	-	-	-	-	-	YNSPA_0385	-	periplasmic protein
392	1	-	-	-	-	-	YNSPA_0497	-	bifunctional UDP-glucuronic acid decarboxylase/UDP-4-amino-4-deoxy-L-arabinose formyltransferase
393	1	-	-	-	-	-	YNSPA_0821	-	flagellar motor switch protein G
394	1	-	-	-	-	-	YNSPA_1207	-	methyl viologen resistance protein SmvA
395	1	-	-	-	-	-	YNSPA_1272	-	anaerobic dimethyl sulfoxide reductase subunit A
396	1	-	-	-	-	-	YNSPA_1543	-	spermidine/putrescine ABC transporter periplasmic substrate-binding protein
397	1	-	-	-	-	-	YNSPA_1934	-	O-antigen export system, permease
398	1	-	-	-	-	-	YNSPA_2101	-	phosphoribosylaminoimidazole carboxylase catalytic subunit
399	1	-	-	-	-	-	YNSPA_2280	-	metabolite transport protein
400	1	-	-	-	-	-	YNSPA_2698	-	N-acetylglutamate synthase
401	1	-	-	-	-	-	YNSPA_3048	-	30S ribosomal subunit protein S9
402	1	-	-	-	-	-	YNSPA_3215	-	transcriptional regulator MalT
403	1	-	-	-	-	-	YNSPA_3237	-	gamma-glutamyltranspeptidase
404	1	-	-	-	-	-	YNSPA_3272	-	ABC transport protein
405	1	-	-	-	-	-	YNSPA_3337	-	hypothetical protein
406	1	-	-	-	-	-	YNSPA_3629	-	5-methyltetrahydropteroyltriglutamate--homocysteine S-methyltransferase
407	1	-	-	-	-	-	YNSPA_3649	-	potassium transporter
408	1	-	-	-	-	-	YNSPA_4002	-	fumarate reductase flavoprotein subunit
409	1	-	-	-	-	-	YNSPA_4094	-	transposase
410	1	-	-	-	-	-	YNSPA_4153	-	hypothetical protein
411	1	-	-	-	-	-	YNSPA_4156	-	HNH nuclease
412	1	-	-	-	-	-	YNSPA_4299	-	sensor kinase DpiB
413	1	-	-	-	-	-	-	ZJSPA_0111	4-hydroxythreonine-4-phosphate dehydrogenase 2
414	1	-	-	-	-	-	-	ZJSPA_0136	hypothetical protein
415	1	-	-	-	-	-	-	ZJSPA_0223	hypothetical protein
416	1	-	-	-	-	-	-	ZJSPA_0474	bifunctional NADH:ubiquinone oxidoreductase subunit C/D
417	1	-	-	-	-	-	-	ZJSPA_0606	gentisate 1,2-dioxygenase
418	1	-	-	-	-	-	-	ZJSPA_0669	DNA-binding transcriptional regulator BaeR
419	1	-	-	-	-	-	-	ZJSPA_0674	chaperone
420	1	-	-	-	-	-	-	ZJSPA_0870	hypothetical protein
421	1	-	-	-	-	-	-	ZJSPA_0908	phosphogluconate dehydratase
422	1	-	-	-	-	-	-	ZJSPA_0915	exodeoxyribonuclease X
423	1	-	-	-	-	-	-	ZJSPA_0944	guanine nucleotide exchange factor SopE
424	1	-	-	-	-	-	-	ZJSPA_0950	hypothetical protein
425	1	-	-	-	-	-	-	ZJSPA_0972	membrane protein TerC family/CBS/transporter associated domain protein
426	1	-	-	-	-	-	-	ZJSPA_1132	transcriptional regulator
427	1	-	-	-	-	-	-	ZJSPA_1181	potassium-tellurite ethidium and proflavin transporter
428	1	-	-	-	-	-	-	ZJSPA_1213	respiratory nitrate reductase 2 subunit alpha
429	1	-	-	-	-	-	-	ZJSPA_1360	type III secretion system protein
430	1	-	-	-	-	-	-	ZJSPA_1386	secreted effector protein
431	1	-	-	-	-	-	-	ZJSPA_1584	glycerol-3-phosphate acyltransferase PlsX
432	1	-	-	-	-	-	-	ZJSPA_1753	pyruvate formate lyase-activating enzyme 1
433	1	-	-	-	-	-	-	ZJSPA_1776	hypothetical protein
434	1	-	-	-	-	-	-	ZJSPA_1901	molybdenum transport ATP-binding protein ModF
435	1	-	-	-	-	-	-	ZJSPA_2039	citrate carrier
436	1	-	-	-	-	-	-	ZJSPA_2108	hypothetical protein
437	1	-	-	-	-	-	-	ZJSPA_2178	cyclic diguanylate phosphodiesterase (EAL) domain-containing protein
438	1	-	-	-	-	-	-	ZJSPA_2217	hypothetical protein
439	1	-	-	-	-	-	-	ZJSPA_2250	branched-chain amino acid transporter
440	1	-	-	-	-	-	-	ZJSPA_2279	2-methylcitrate dehydratase
441	1	-	-	-	-	-	-	ZJSPA_2281	methylcitrate synthase
442	1	-	-	-	-	-	-	ZJSPA_2285	propionate catabolism operon regulatory protein
443	1	-	-	-	-	-	-	ZJSPA_2335	fimbrial protein
444	1	-	-	-	-	-	-	ZJSPA_2399	2,5-diketo-D-gluconate reductase B
445	1	-	-	-	-	-	-	ZJSPA_2507	phage gene
446	1	-	-	-	-	-	-	ZJSPA_2612	AraC family transcriptional regulator
447	1	-	-	-	-	-	-	ZJSPA_2719	SecY interacting protein Syd
448	1	-	-	-	-	-	-	ZJSPA_2744	exonuclease V subunit alpha
449	1	-	-	-	-	-	-	ZJSPA_2991	pirin family protein
450	1	-	-	-	-	-	-	ZJSPA_2999	threonine dehydratase
451	1	-	-	-	-	-	-	ZJSPA_3020	hypothetical protein
452	1	-	-	-	-	-	-	ZJSPA_3089	sialic acid transporter
453	1	-	-	-	-	-	-	ZJSPA_3277	transcriptional regulator
454	1	-	-	-	-	-	-	ZJSPA_3329	inner membrane transporter YhiP
455	1	-	-	-	-	-	-	ZJSPA_3349	Zn-dependent peptidase
456	1	-	-	-	-	-	-	ZJSPA_3397	periplasmic alpha-amylase
457	1	-	-	-	-	-	-	ZJSPA_3528	acetolactate synthase catalytic subunit
458	1	-	-	-	-	-	-	ZJSPA_3543	ATP/GTP-binding protein
459	1	-	-	-	-	-	-	ZJSPA_3647	cytoplasmic protein
460	1	-	-	-	-	-	-	ZJSPA_3676	inner membrane protein
461	1	-	-	-	-	-	-	ZJSPA_3684	FMN reductase
462	1	-	-	-	-	-	-	ZJSPA_3725	hypothetical protein
463	1	-	-	-	-	-	-	ZJSPA_3778	phage tail protein
464	1	-	-	-	-	-	-	ZJSPA_3891	endonuclease V
465	1	-	-	-	-	-	-	ZJSPA_3918	hypothetical protein
466	1	-	-	-	-	-	-	ZJSPA_3970	inner membrane protein
467	1	-	-	-	-	-	-	ZJSPA_4101	transcriptional regulator
468	1	-	-	-	-	-	-	ZJSPA_4196	hypothetical protein
